# Supplementary material
Source: PubMed Central journal article supplement (PMC3199006)
Supplement: supp_en.2011-0117v1_EN_11_0117_figs_1-3_Tab_1.pdf [file supp_en.2011-0117v1_EN_11_0117_figs_1-3_Tab_1.pdf]

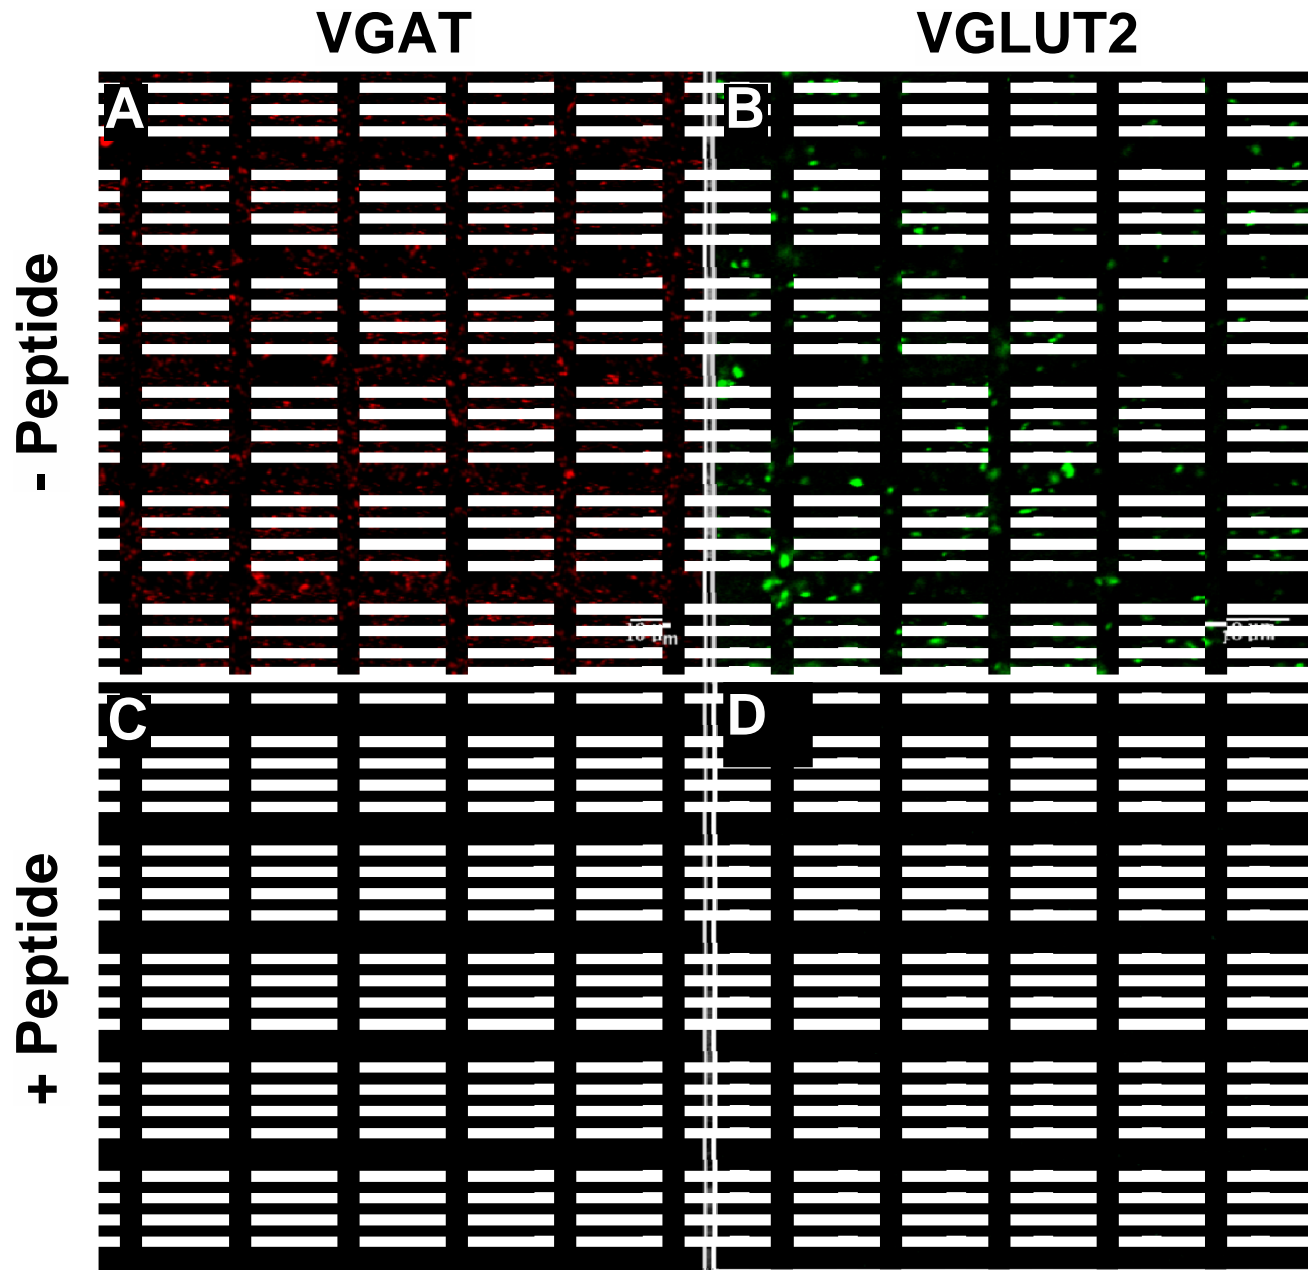

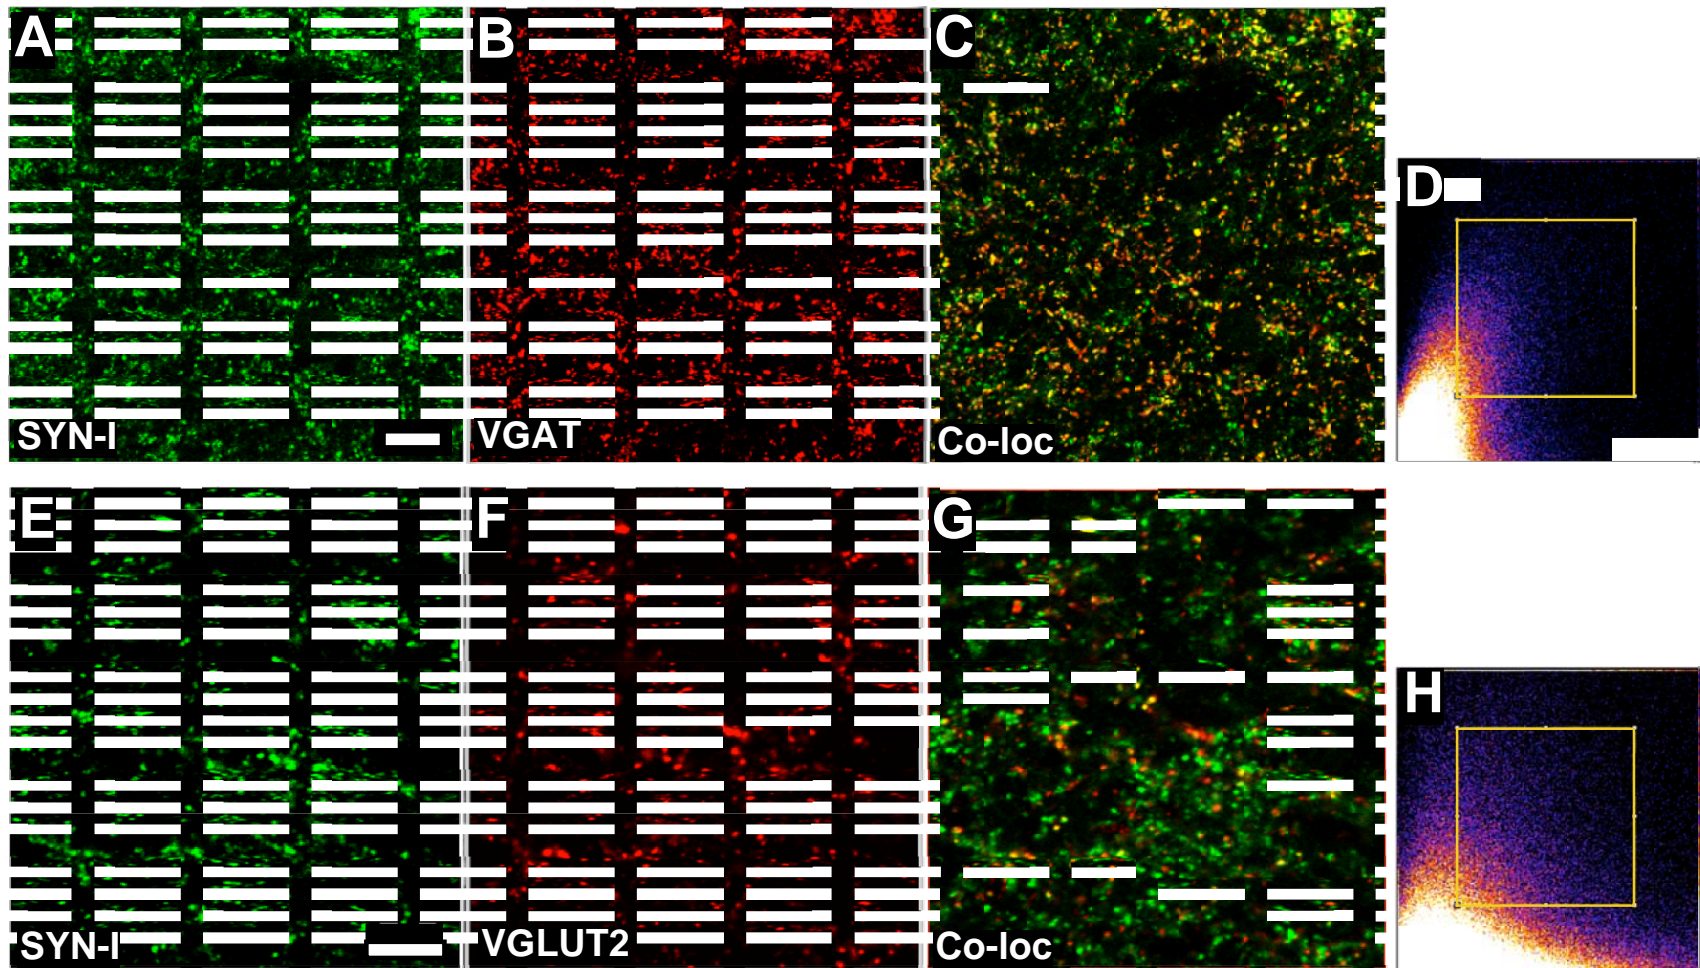

**Supplemental Figure 3**

Jansen, et al

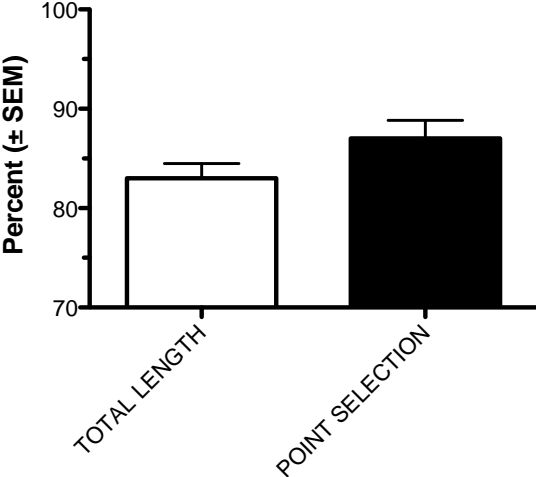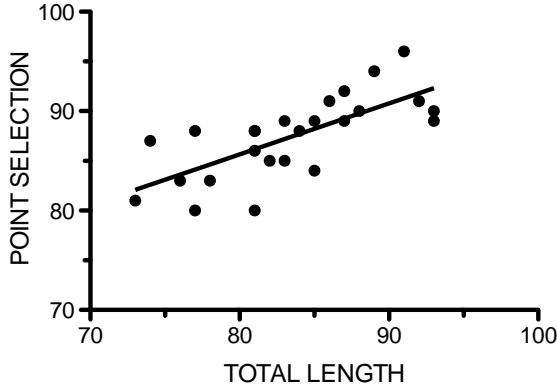

## Supplemental Table 1

Jansen, et al

**Table 1. Details of the antibodies used to examine effect of prenatal testosterone on developmental changes in total, glutamate and GABA inputs to GnRH neurons in sheep.**

| <i>Neural Marker or IgG</i> | <i>Immunogenic sequence (1°) or fluorochrome (2°)</i> | <i>Host Species</i> | <i>Source</i>                             | <i>Dilution</i> |
|-----------------------------|-------------------------------------------------------|---------------------|-------------------------------------------|-----------------|
| Total                       | Bovine synapsin I                                     | Rbt Polyclonal      | Sigma-Aldrich (#S193)                     | 1:2,500         |
| Total                       | Rat synapsin I <sup>†</sup>                           | Mo Monoclonal       | Synaptic Systems (#106 001)               | 1:50            |
| GnRH                        | GnRH aa 7-10                                          | Rbt Polyclonal      | Dr. Robert Benoit (LR5)                   | 1:7,000         |
| GnRH                        | GnRH aa 6-10                                          | Mo Monoclonal       | Sternberger Monoclonals, Inc. (#SMI-41)   | 1:100           |
| VGLUT2                      | VGLUT2 aa 510-582                                     | Rbt Polyclonal      | Synaptic Systems, GmbH (#135 403)         | 1:500           |
| VGAT                        | VGAT aa 75-87                                         | Mo Monoclonal       | Synaptic Systems (#131 011)               | 1:30            |
| Rbt IgG                     | Cy3                                                   | Dky                 | Jackson ImmunoResearch Laboratories, Inc. | 1:200           |
| Mo IgG                      | Cy2, Alexa488                                         | Dky                 | Jackson; Invitrogen                       | 1:200           |

*Abbreviations: 1° - primary antibody; 2° - secondary antibody; Dky – donkey; Gt – goat; GP – guinea pig; Mo – mouse; Rbt - rabbit*

<sup>†</sup>-used only for VGLUT2 colocalization (see Supplemental Figure 2)
